# Supplementary material for: Unveiling the evolutionary relationships and the high cryptic diversity in Andean rainfrogs (Craugastoridae: Pristimantis myersi group)
Source: PeerJ journal article supplement (doi:10.7717/peerj.14715), 2023-03-01

Tree scale: 0.1

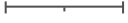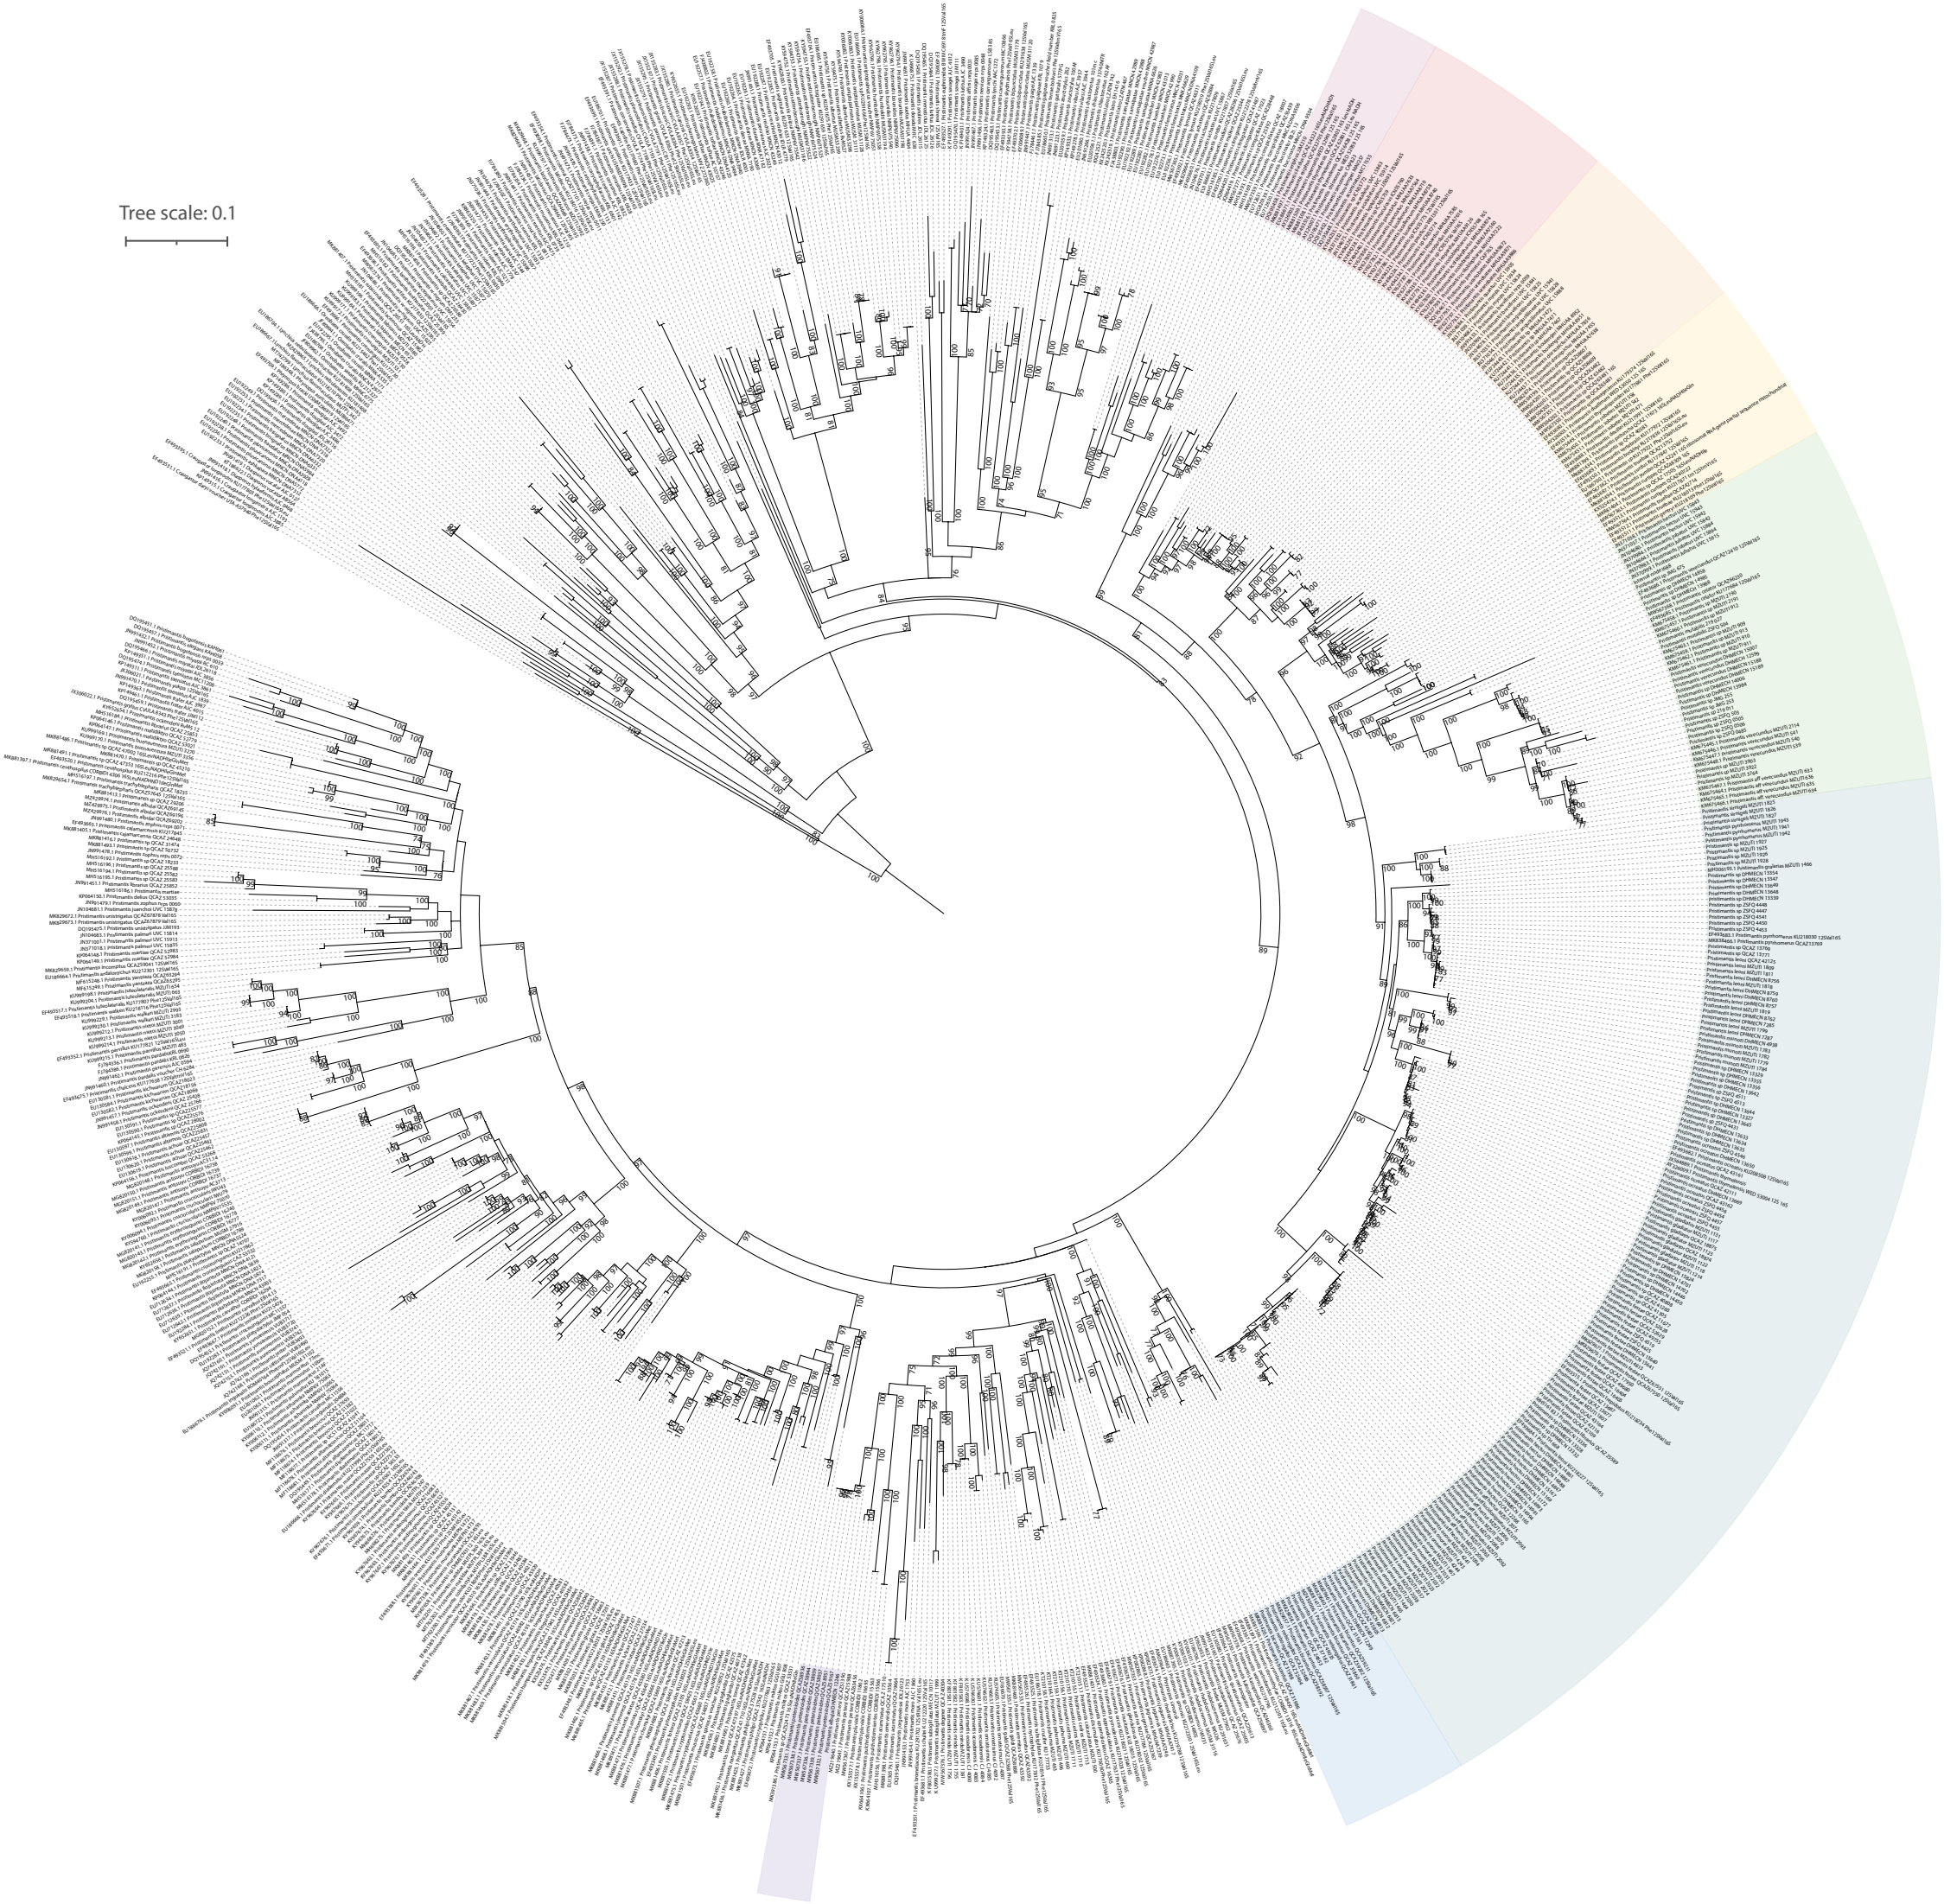

Supplement: Figure_S2.pdf [file Figure_S2.pdf]
